# Supplementary material
Source: Springer Nature journal article supplement (https://www.springermedizin.de/resource/supplementary/13054_2009_7633_MOESM2_ESM.pdf/9730218)

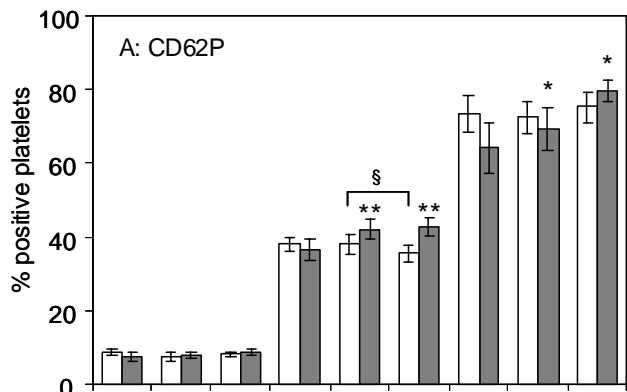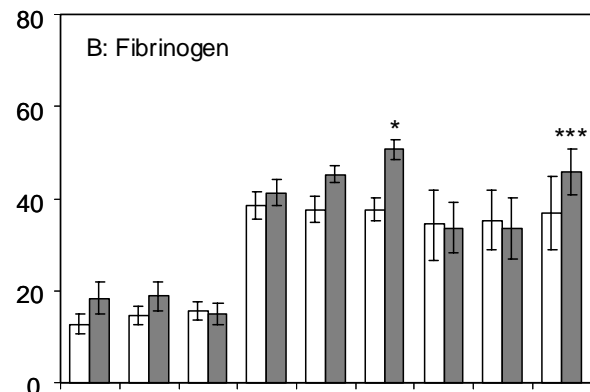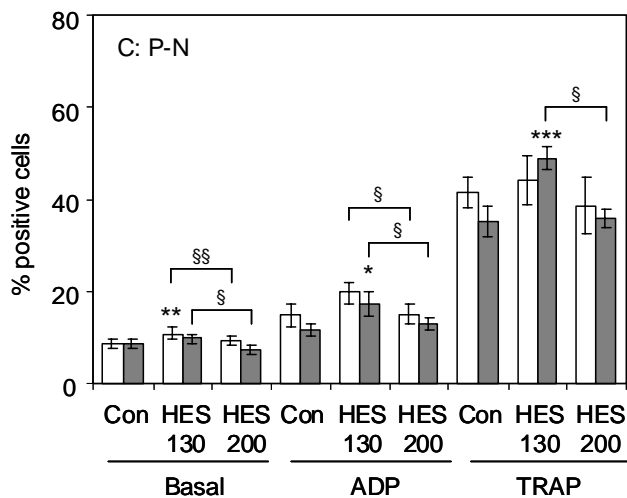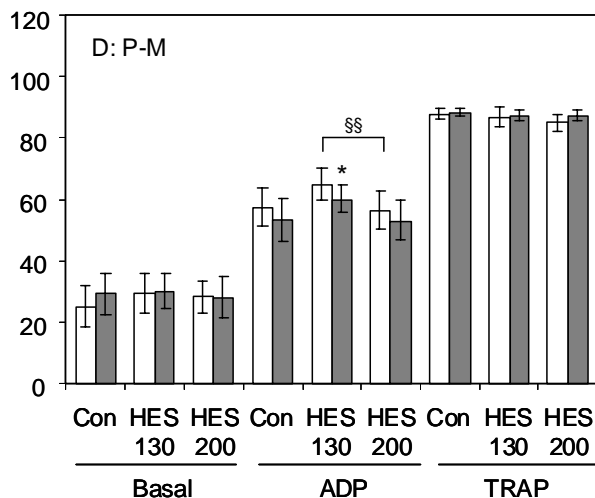

Supplement: MOESM2 [file 9730218]
